# Supplementary material
Source: PubMed Central journal article supplement (PMC3832580)
Supplement: supp_130628_iron-pasricha-1-at.pdf [file supp_130628_iron-pasricha-1-at.pdf]

## **Appendix 1: Search strategy for SCOPUS**

1. Iron or ferric or ferrous
2. random or rct or drug therapy or diet therapy or placebo or trial or randomised controlled trial or randomized controlled trial
3. child or schoolchild or boy or girl or school or teen or adolescent or preteen or youth or young person or young people
4. 1 & 2 & 3
5. trace element or micronutrient
6. 2 & 3 & 5 not 4.
7. (anaemic or anaemia or anemic or anemia) & (diet or supplement\*)
8. 2 & 3 & 7 & not 6 & not 4
9. Overall search: 4 & 6 &
