# Supplementary material
Source: PubMed Central journal article supplement (PMC3832580)
Supplement: supp_130628_iron-pasricha-2-at.pdf [file supp_130628_iron-pasricha-2-at.pdf]

## Appendix 2: Complete summary of findings

| Outcome                         | Subgroup                  | Number of trials | Number Subjects | Mean difference (MD)/ Standardised mean difference (SMD)/Risk Ratio/Rate Ratio [95% Confidence Interval] | P- value for effect | I <sup>2</sup> | P -value for subgroup difference                                |
|---------------------------------|---------------------------|------------------|-----------------|----------------------------------------------------------------------------------------------------------|---------------------|----------------|-----------------------------------------------------------------|
| <b>Haematology</b>              |                           |                  |                 |                                                                                                          |                     |                |                                                                 |
| <b>Hemoglobin (MD)</b>          | Overall                   | 28               | 6545            | 8.38 [6.21 -10.56]                                                                                       | <0.00001            | 97%            | N/A                                                             |
| Baseline Hemoglobin             | Anemic                    | 12               | 1937            | 18.95 [13.61-24.28]                                                                                      | <0.00001            | 99%            | Chi <sup>2</sup> =22.38; df=2, P=0.0001; I <sup>2</sup> =90.9%  |
|                                 | Non-anemic                | 7                | 1484            | 6.33 [2.66-10.00]                                                                                        | 0.0007              | 93%            |                                                                 |
|                                 | Mixed/unreported          | 16               | 2943            | 5.40 [3.47-7.32]                                                                                         | <0.00001            | 88%            |                                                                 |
| Baseline iron status            | Iron Deficient            | 6                | 797             | 23.21 [13.53-32.88]                                                                                      | <0.00001            | 99%            | Chi <sup>2</sup> =19.15; df=2, P<0.0001; I <sup>2</sup> =89.6%  |
|                                 | Iron Replete              | 4                | 1383            | 3.42 [1.67-5.17]                                                                                         | 0.0001              | 48%            |                                                                 |
|                                 | Mixed/ unreported         | 21               | 4107            | 6.58 [4.60-8.56]                                                                                         | <0.00001            | 92%            |                                                                 |
| Baseline Iron Deficiency status | Iron deficiency anemia    | 4                | 716             | 28.78 [16.08-41.49]                                                                                      | <0.00001            | 99%            | Chi <sup>2</sup> =29.02; df=3, P=0.20; I <sup>2</sup> =89.7%    |
|                                 | Iron deficient not anemic | 2                | 68              | 5.72 [2.98-8.46]                                                                                         | <0.00001            | 0%             |                                                                 |
|                                 | Not replete non anemic    | 3                | 1323            | 2.92 [2.08-3.76]                                                                                         | <0.00001            | 0%             |                                                                 |
|                                 | Mixed/Unreported          | 23               | 4436            | 7.12 [4.84-9.41]                                                                                         | <0.00001            | 96%            |                                                                 |
| Dose                            | 12.5mg or less            | 4                | 850             | 6.15 [1.33-10.98]                                                                                        | 0.01                | 92%            | Chi <sup>2</sup> =6.33; df=4, P=0.2; I <sup>2</sup> =36.8%      |
|                                 | 12.6-30mg                 | 4                | 1025            | 5.33 [0.21-10.46]                                                                                        | 0.04                | 88%            |                                                                 |
|                                 | 31-60mg                   | 8                | 1831            | 11.13 [6.98-15.45]                                                                                       | <0.00001            | 97%            |                                                                 |
|                                 | >61mg                     | 9                | 1236            | 6.10 [4.50-7.71]                                                                                         | <0.00001            | 61%            |                                                                 |
|                                 | Mixed/Unspecified         | 3                | 1603            | 12.44 [1.70-23.18]                                                                                       | 0.02                | 97%            |                                                                 |
| Duration                        | 1 month or less           | 0                | N/A             |                                                                                                          |                     |                | Chi <sup>2</sup> =4.27; df=1, P=0.04; I <sup>2</sup> =76.6%     |
|                                 | >1 month to 3 months      | 14               | 2401            | 10.62 [7.27-13.98]                                                                                       | <0.00001            | 96%            |                                                                 |
|                                 | > 3 months                | 14               | 4144            | 6.46 [4.38-8.54]                                                                                         | <0.00001            | 97%            |                                                                 |
| Malaria endemicity              | Endemic                   | 9                | 2203            | 9.71 [4.79-14.63]                                                                                        | 0.0001              | 95%            | Chi <sup>2</sup> =13.87; df=2, P=0.001; I <sup>2</sup> =85.6%   |
|                                 | Non-Endemic               | 3                | 1980            | 3.89 [2.99-4.80]                                                                                         | <0.00001            | 12%            |                                                                 |
|                                 | Unstated                  | 16               | 2362            | 8.67 [5.75-11.59]                                                                                        | <0.00001            | 97%            |                                                                 |
| Iron Combination                | Iron vs control           | 22               | 3721            | 10.54 [7.98-13.11]                                                                                       | <0.00001            | 96%            | Chi <sup>2</sup> =18.83; df=1, P<0.00001; I <sup>2</sup> =94.7% |
|                                 | Iron + X vs X alone       | 10               | 2824            | 3.60 [1.80-5.41]                                                                                         | <0.00001            | 77%            |                                                                 |
| <b>Anemia (Risk Ratio)</b>      | Overall                   | 7                | 1763            | 0.50 [0.39-0.64]                                                                                         | <0.00001            | 85%            | N/A                                                             |
| Baseline Hemoglobin             | Anemic                    | 3                | 797             | 0.46 [0.30-0.69]                                                                                         | 0.0002              | 91%            | Chi <sup>2</sup> =0.516; df=1, P=0.7; I <sup>2</sup> =0%        |
|                                 | Non-anemic                | 0                | N/A             |                                                                                                          |                     |                |                                                                 |
|                                 | Mixed/unreported          | 4                | 966             | 0.46 [0.34-0.62]                                                                                         | 0.004               | 83%            |                                                                 |
| Baseline iron status            | Iron Deficient            | 1                | 480             | 0.54 [0.47-0.61]                                                                                         | <0.00001            | N/A            | Chi <sup>2</sup> =0.47; df=1, P=0.5; I <sup>2</sup> =0%         |
|                                 | Iron Replete              | 0                | N/A             |                                                                                                          |                     |                |                                                                 |
|                                 | Mixed/ unreported         | 6                | 1283            | 0.47 [0.33-0.67]                                                                                         | <0.00001            | 88%            |                                                                 |

|                                            |                           |   |      |                    |          |      |                                                                 |
|--------------------------------------------|---------------------------|---|------|--------------------|----------|------|-----------------------------------------------------------------|
| Baseline Iron Deficiency status            | Iron deficiency anemia    | 1 | 480  | 0.54 [0.47-0.61]   | <0.00001 | N/A  | Chi <sup>2</sup> =0.47; df=1, P=0.5; I <sup>2</sup> =0%         |
|                                            | Iron deficient not anemic | 0 | N/A  |                    |          |      |                                                                 |
|                                            | Not replete non anemic    | 0 | N/A  |                    |          |      |                                                                 |
|                                            | Mixed/Unreported          | 6 | 1283 | 0.47 [0.33-0.67]   | <0.00001 | 88%  |                                                                 |
| Dose                                       | 12.5mg or less            | 0 | N/A  |                    |          |      | Chi <sup>2</sup> =13.57; df=1, P=0.003; I <sup>2</sup> =88.3%   |
|                                            | 12.6-30mg                 | 0 | N/A  |                    |          |      |                                                                 |
|                                            | 31-60mg                   | 6 | 1648 | 0.57 [0.46-0.69]   | <0.00001 | 78%  |                                                                 |
|                                            | >61mg                     | 0 | N/A  |                    |          |      |                                                                 |
|                                            | Dose mixed/ unspecified   | 1 | 115  | 0.18 [0.10-0.32]   | <0.00001 | N/A  |                                                                 |
| Duration                                   | 1 month or less           | 0 | N/A  |                    |          |      | Chi <sup>2</sup> =8.56; df=1, P=0.005; I <sup>2</sup> =87.1%    |
|                                            | >1 month to 3 months      | 4 | 1255 | 0.62 [0.53-0.73]   | <0.00001 | 74%  |                                                                 |
|                                            | > 3 months                | 3 | 508  | 0.24 [0.13-0.44]   | <0.00001 | 56%  |                                                                 |
| Malaria endemicity                         | Endemic                   | 2 | 682  | 0.60 [0.48-0.75]   | <0.00001 | 78%  | Chi <sup>2</sup> =2.64; df=2, P=0.3; I <sup>2</sup> =24.1%      |
|                                            | Non-Endemic               | 2 | 626  | 0.32 [0.02-4.58]   | 0.4      | 73%  |                                                                 |
|                                            | Unstated                  | 3 | 455  | 0.33 [0.17-0.67]   | <0.00001 | 92%  |                                                                 |
| Iron Combination                           | Iron vs control           | 5 | 1298 | 0.47 [0.35-0.63]   | <0.00001 | 87%  | Chi <sup>2</sup> =0.15; df=1, P=0.7; I <sup>2</sup> =0%         |
|                                            | Iron + X vs X alone       | 2 | 465  | 0.28 [0.02-3.57]   | 0.33     | 71%  |                                                                 |
| <b>Iron deficiency Anemia (Risk ratio)</b> | Overall                   | 2 | 334  | 0.12 [0.02-0.66]   | 0.01     | 0%   | N/A                                                             |
| <b>Haematocrit (MD)</b>                    | Overall                   | 6 | 895  | 1.70 [0.52-2.89]   | 0.005    | 89%  | N/A                                                             |
| Baseline Hemoglobin                        | Anemic                    | 2 | 117  | 6.56 [-1.92-15.04] | 0.1      | 100% | Chi <sup>2</sup> =1.68; df=2, P=0.4; I <sup>2</sup> =0%         |
|                                            | Non-anemic                | 2 | 132  | 0.87 [-0.95-2.69]  | 0.4      | 90%  |                                                                 |
|                                            | Mixed/unreported          | 4 | 646  | 0.94 [-0.13-2.02]  | 0.09     | 72%  |                                                                 |
| Baseline iron status                       | Iron Deficient            | 2 | 117  | 6.56 [-1.92-15.04] | 0.1      | 100% | Chi <sup>2</sup> =1.68; df=2, P=0.4; I <sup>2</sup> =0%         |
|                                            | Iron Replete              | 2 | 132  | 0.87 [-0.95-2.69]  | 0.4      | 90%  |                                                                 |
|                                            | Mixed/ unreported         | 4 | 646  | 0.94 [-0.13-2.02]  | 0.09     | 72%  |                                                                 |
| Baseline Iron Deficiency status            | Iron deficiency anemia    | 2 | 117  | 6.56 [-1.92-15.04] | 0.1      | 100% | Chi <sup>2</sup> =1.68; df=2, P=0.4; I <sup>2</sup> =0%         |
|                                            | Iron deficient not anemic | 0 | N/A  |                    |          |      |                                                                 |
|                                            | Not replete non anemic    | 2 | 132  | 0.87 [-0.95-2.69]  | 0.4      | 90%  |                                                                 |
|                                            | Mixed/Unreported          | 4 | 646  | 0.94 [-0.13-2.02]  | 0.09     | 72%  |                                                                 |
| Dose                                       | 12.5mg or less            | 1 | 87   | 1.0 [-0.57-2.57]   | 0.2      | N/A  | Chi <sup>2</sup> =51.23; df=3, P<0.00001; I <sup>2</sup> =94.1% |
|                                            | 12.6-30mg                 | 0 | N/A  |                    |          |      |                                                                 |
|                                            | 31-60mg                   | 1 | 437  | -0.10 [-0.57-0.37] | 0.7      | N/A  |                                                                 |
|                                            | >61mg                     | 3 | 241  | 1.83 [1.33-2.34]   | <0.00001 | 0%   |                                                                 |
|                                            | Dose mixed/ unspecified   | 1 | 130  | 4.39 [2.89-5.89]   | <0.00001 | N/A  |                                                                 |
| Duration                                   | 1 month or less           | 0 | N/A  |                    |          |      | Chi <sup>2</sup> =0.09; df=1, P=0.8; I <sup>2</sup> =0%         |
|                                            | >1 month to 3 months      | 5 | 823  | 1.76 [0.28-3.24]   | 0.02     | 90%  |                                                                 |

|                                     |                           |    |      |                      |          |      |                                                                      |
|-------------------------------------|---------------------------|----|------|----------------------|----------|------|----------------------------------------------------------------------|
|                                     | > 3 months                | 1  | 72   | 1.50 [0.68-2.32]     | 0.0003   | N/A  |                                                                      |
| Malaria endemicity                  | Endemic                   | 2  | 137  | 1.37 [0.00-2.74]     | 0.05     | N/A  | Chi <sup>2</sup> =0.2; df=1,<br>P=0.7; I <sup>2</sup> =0%            |
|                                     | Non-Endemic               | 0  | N/A  |                      |          |      |                                                                      |
|                                     | Unstated                  | 4  | 758  | 1.83 [0.29-3.38]     | 0.02     | 94%  |                                                                      |
| Iron Combination                    | Iron vs control           | 4  | 678  | 1.93 [-0.74-4.59]    | 0.2      | 91%  | Chi <sup>2</sup> =0.02; df=1,<br>P=0.9; I <sup>2</sup> =0%           |
|                                     | Iron + X vs X alone       | 3  | 217  | 1.76 [1.26-2.25]     | <0.00001 | 0%   |                                                                      |
| <b>MCV (MD)</b>                     | Overall                   | 2  | 169  | 3.46 [2.59-4.33]     | <0.00001 | 0%   | N/A                                                                  |
| <b>MCH (MD)</b>                     | Overall                   | 2  | 169  | 1.77 [1.20-2.33]     | <0.00001 | 0%   | N/A                                                                  |
| <b>Iron status</b>                  |                           |    |      |                      |          |      |                                                                      |
| <b>Iron deficiency (Risk Ratio)</b> | Overall                   | 4  | 1020 | 0.21 [0.07-0.63]     | 0.006    | 85%  | N/A                                                                  |
| <b>Ferritin (MD)</b>                | Overall                   | 12 | 3612 | 28.45 [18.03-38.86]  | <0.00001 | 98%  | N/A                                                                  |
| Baseline Hemoglobin                 | Anemic                    | 4  | 841  | 35.73 [22.75-48.70]  | <0.00001 | 86%  | Chi <sup>2</sup> =1.60; df=2,<br>P=0.5; I <sup>2</sup> =0%           |
|                                     | Non-anemic                | 4  | 1354 | 27.94 [-2.04-57.93]  | 0.07     | 99%  |                                                                      |
|                                     | Mixed/unreported          | 6  | 1415 | 25.48 [16.28-34.69]  | <0.00001 | 86%  |                                                                      |
| Baseline iron status                | Iron Deficient            | 4  | 707  | 28.47 [19.60-37.30]  | <0.00001 | 87%  | Chi <sup>2</sup> =0.15; df=2,<br>P=0.9; I <sup>2</sup> =0%           |
|                                     | Iron Replete              | 2  | 1270 | 35.97 [-18.78-90.72] | 0.2      | 100% |                                                                      |
|                                     | Mixed/ unreported         | 8  | 1633 | 26.52 [14.34-38.70]  | <0.00001 | 96%  |                                                                      |
| Baseline Iron Deficiency status     | Iron deficiency anemia    | 3  | 639  | 25.45 [16.94-33.95]  | <0.00001 | 86%  | Chi <sup>2</sup> =3.68; df=3,<br>P=0.3; I <sup>2</sup> =18.5%        |
|                                     | Iron deficient not anemic | 2  | 68   | 39.77 [27.31-52.22]  | <0.00001 | 0%   |                                                                      |
|                                     | Not replete non anemic    | 2  | 1270 | 35.97 [-18.78-90.72] | 0.2      | 100% |                                                                      |
|                                     | Mixed/Unreported          | 8  | 1633 | 27.04 [14.28-39.79]  | <0.00001 | 96%  |                                                                      |
| Dose                                | 12.5mg or less            | 3  | 660  | 22.09 [6.16-38.03]   | 0.007    | 97%  | Chi <sup>2</sup> =56.61; df=4,<br>P<0.0001;<br>I <sup>2</sup> =92.9% |
|                                     | 12.6-30mg                 | 1  | 63   | 9.08 [-20.72-38.88]  | 0.55     | N/A  |                                                                      |
|                                     | 31-60mg                   | 5  | 1390 | 32.23 [19.05-45.42]  | <0.0001  | 94%  |                                                                      |
|                                     | >61mg                     | 2  | 141  | 23.18 [2.38-43.98]   | 0.03     | 90%  |                                                                      |
|                                     | Dose mixed/ unspecified   | 1  | 1358 | 25.98 [15.39 -36.36] | <0.0001  | N/A  |                                                                      |
| Duration                            | 1 month or less           | 0  | N/A  |                      |          |      | Chi <sup>2</sup> =0.05; df=1,<br>P=0.8; I <sup>2</sup> =0%           |
|                                     | >1 month to 3 months      | 6  | 1249 | 27.49 [17.80-37.18]  | <0.0001  | 90%  |                                                                      |
|                                     | > 3 months                | 6  | 2363 | 30.02 [10.43-49.60]  | 0.003    | 99%  |                                                                      |
| Malaria endemicity                  | Endemic                   | 3  | 768  | 31.62 [11.93-51.31]  | <0.0001  | 95%  | Chi <sup>2</sup> =0.74; df=2,<br>P=0.7; I <sup>2</sup> =0%           |
|                                     | Non-Endemic               | 4  | 1996 | 33.05 [1.59-64.50]   | 0.04     | 99%  |                                                                      |
|                                     | Unstated                  | 5  | 848  | 23.58 [13.88-33.27]  | <0.0001  | 88%  |                                                                      |
| Iron Combination                    | Iron vs control           | 7  | 1288 | 22.59 [12.58-32.59]  | <0.0001  | 95%  | Chi <sup>2</sup> =1.06; df=1,<br>P=0.3; I <sup>2</sup> =6%           |
|                                     | Iron + X vs X alone       | 7  | 2324 | 33.89 [14.89-52.88]  | <0.0001  | 98%  |                                                                      |
| <b>Transferrin Saturations (MD)</b> | Overall                   | 5  | 1856 | 7.10 [4.51-9.68]     | <0.0001  | 93%  | N/A                                                                  |
| Baseline Hemoglobin                 | Anemic                    | 4  | 295  | 12.24 [5.04-19.45]   | 0.0009   | 99%  | Chi <sup>2</sup> =12.84; df=2,                                       |

|                                           |                           |   |      |                    |         |     |                                                                      |
|-------------------------------------------|---------------------------|---|------|--------------------|---------|-----|----------------------------------------------------------------------|
|                                           | Non-anemic                | 4 | 1429 | 2.70 [0.24-5.16]   | 0.03    | 91% | P=0.002;<br>I <sup>2</sup> =84.4%                                    |
|                                           | Mixed/unreported          | 1 | 130  | 8.89 [3.58-11.49]  | <0.0001 | N/A |                                                                      |
| Baseline iron status                      | Iron Deficient            | 4 | 341  | 11.94 [4.87-19.01] | 0.0009  | 99% | Chi <sup>2</sup> =12.96; df=2,<br>P=0.002;<br>I <sup>2</sup> =84.6%  |
|                                           | Iron Replete              | 4 | 1383 | 2.68 [0.28-5.09]   | 0.03    | 91% |                                                                      |
|                                           | Mixed/ unreported         | 1 | 130  | 8.89 [3.58-11.49]  | <0.0001 | N/A |                                                                      |
| Baseline Iron Deficiency status           | Iron deficiency anemia    | 4 | 295  | 12.24 [5.04-19.45] | 0.0009  | 99% | Chi <sup>2</sup> =13.68; df=3,<br>P=0.003;<br>I <sup>2</sup> =78.1%  |
|                                           | Iron deficient not anemic | 1 | 46   | 7.70 [2.04-13.36]  | 0.008   | N/A |                                                                      |
|                                           | Not replete non anemic    | 4 | 1383 | 2.68 [0.28-5.09]   | 0.03    | 91% |                                                                      |
|                                           | Mixed/Unreported          | 1 | 130  | 8.89 [3.58-11.49]  | <0.0001 | N/A |                                                                      |
| Dose                                      | 12.5mg or less            | 1 | 119  | 11.27 [8.87-13.67] | <0.0001 | N/A | Chi <sup>2</sup> =54.74; df=3,<br>P<0.0001;<br>I <sup>2</sup> =94.5% |
|                                           | 12.6-30mg                 | 0 | N/A  |                    |         |     |                                                                      |
|                                           | 31-60mg                   | 1 | 130  | 8.89 [5.76-12.02]  | <0.0001 | N/A |                                                                      |
|                                           | >61mg                     | 1 | 119  | 3.37 [2.56-4.18]   | <0.0001 | N/A |                                                                      |
|                                           | Dose mixed/ unspecified   | 2 | 1488 | 6.36 [5.37-7.35]   | <0.0001 | 0%  |                                                                      |
| Duration                                  | 1 month or less           | 0 | N/A  |                    |         |     | Chi <sup>2</sup> =0.02; df=1,<br>P=0.9; I <sup>2</sup> =0%           |
|                                           | >1 month to 3 months      | 2 | 238  | 7.24 [-0.50-14.98] | 0.07    | 97% |                                                                      |
|                                           | > 3 months                | 3 | 1618 | 6.68 [5.56-7.80]   | <0.0001 | 15% |                                                                      |
| Malaria endemicity                        | Endemic                   | 1 | 119  | 11.27 [8.87-13.67] | <0.0001 | N/A | Chi <sup>2</sup> =13.98; df=2,<br>P=0.0009;<br>I <sup>2</sup> =85.7% |
|                                           | Non-Endemic               | 1 | 1358 | 6.29 [5.17-7.41]   | <0.0001 | N/A |                                                                      |
|                                           | Unstated                  | 3 | 379  | 6.04 [2.75-9.33]   | 0.0003  | 89% |                                                                      |
| Iron Combination                          | Iron vs control           | 3 | 379  | 8.89 [5.96-11.81]  | <0.0001 | 75% | Chi <sup>2</sup> =3.83; df=1,<br>P=0.05; I <sup>2</sup> =73.9%       |
|                                           | Iron + X vs X alone       | 2 | 1477 | 4.80 [1.94-7.66]   | 0.001   | 94% |                                                                      |
| <b>Serum Iron (MD)</b>                    | Overall                   | 3 | 199  | 3.06 [-0.88-7.00]  | 0.1     | 86% | N/A                                                                  |
| <b>Soluble Transferrin Receptor</b>       | Overall                   | 2 | 224  | -0.15 [-0.41-0.12] | 0.28    | 0%  | N/A                                                                  |
| <b>Cognition</b>                          |                           |   |      |                    |         |     |                                                                      |
| <b>Global cognitive performance (SMD)</b> | Overall                   | 9 | 2355 | 0.50 [0.11-0.90]   | 0.01    | 93% | N/A                                                                  |
| Baseline Hemoglobin                       | Anemic                    | 6 | 487  | 0.29 [0.07-0.51]   | 0.01    | 22% | Chi <sup>2</sup> =6.13; df=2,<br>P=0.05; I <sup>2</sup> =67.4%       |
|                                           | Non-anemic                | 4 | 1361 | 0.01 [-0.10-0.11]  | 0.9     | 0%  |                                                                      |
|                                           | Mixed/unreported          | 3 | 488  | 0.86 [-0.63-2.35]  | 0.3     | 92% |                                                                      |
| Baseline iron status                      | Iron Deficient            | 2 | 204  | 0.18 [-0.25-0.61]  | 0.4     | 51% | Chi <sup>2</sup> =4.45; df=2,<br>P=0.1; I <sup>2</sup> =55.0%        |
|                                           | Iron Replete              | 2 | 1282 | 0.00 [-0.11-0.11]  | 1.0     | 0%  |                                                                      |
|                                           | Mixed/ unreported         | 7 | 867  | 0.65 [0.02-1.28]   | 0.04    | 94% |                                                                      |
| Baseline Iron Deficiency status           | Iron deficiency anemia    | 2 | 158  | 0.24 [-0.08-0.56]  | 0.1     | 2%  | Chi <sup>2</sup> =6.93; df=3,<br>P=0.07; I <sup>2</sup> =56.7%       |
|                                           | Iron deficient not anemic | 1 | 46   | -0.31 [0.89-0.27]  | 0.3     | N/A |                                                                      |
|                                           | Not replete non anemic    | 2 | 1282 | 0.00 [-0.11-0.11]  | 1.0     | 0%  |                                                                      |
|                                           | Mixed/Unreported          | 7 | 867  | 0.65 [0.02-1.28]   | 0.04    | 94% |                                                                      |
| Dose                                      | 12.5mg or less            | 0 | N/A  |                    |         |     | Chi <sup>2</sup> =5.18; df=2,                                        |

|                                   |                           |   |      |                         |         |      |                                                                       |
|-----------------------------------|---------------------------|---|------|-------------------------|---------|------|-----------------------------------------------------------------------|
|                                   | 12.6-30mg                 | 2 | 125  | 1.62 [0.25-2.99]        | 0.02    | 88%  | P=0.07; I <sup>2</sup> =61.4%                                         |
|                                   | 31-60mg                   | 5 | 742  | 0.29 [-0.23-0.80]       | 0.3     | 91%  |                                                                       |
|                                   | >61mg                     | 0 | N/A  |                         |         |      |                                                                       |
|                                   | Dose mixed/ unspecified   | 2 | 1488 | 0.07 [-0.15-0.29]       | 0.5     | 45%  |                                                                       |
| Duration                          | 1 month or less           | 0 | N/A  |                         |         |      | Chi <sup>2</sup> =2.32; df=1,<br>P=0.1; I <sup>2</sup> =56.8%         |
|                                   | >1 month to 3 months      | 5 | 505  | 0.84 [0.09-1.59]        | 0.03    | 93%  |                                                                       |
|                                   | > 3 months                | 4 | 1850 | 0.15 [-0.30-0.61]       | 0.50    | 92a% |                                                                       |
| Malaria endemicity                | Endemic                   | 1 | 202  | 0.10 [-0.18-0.38]       | 0.5     | N/   | Chi <sup>2</sup> =8.99; df=1,<br>P=0.01; I <sup>2</sup> =77.8%        |
|                                   | Non-Endemic               | 2 | 1619 | -0.24 [-0.72-0.25]      | 0.3     | 92%  |                                                                       |
|                                   | Unstated                  | 6 | 534  | 0.88 [0.32-1.44]        | 0.002   | 89%  |                                                                       |
| Iron Combination                  | Iron vs control           | 6 | 534  | 0.88 [0.32-1.44]        | 0.0002  | 89%  | Chi <sup>2</sup> =9.30; df=1,<br>P=0.002;<br>I <sup>2</sup> =89.2%    |
|                                   | Iron + X vs X alone       | 3 | 1821 | -0.13 [-0.45-0.19]      | 0.4     | 86%  |                                                                       |
| <b>Intelligence Quotient (MD)</b> | Overall                   | 5 | 1874 | 5.47 [-3.24-14.18]      | 0.22    | 97%  |                                                                       |
| Baseline Hemoglobin               | Anemic                    | 3 | 186  | 4.55 [0.16-8.94]        | 0.04    | 28%  | Chi <sup>2</sup> =3.60; df=2,<br>P=0.2; I <sup>2</sup> =44.5%         |
|                                   | Non-anemic                | 2 | 1328 | 0.08 [-1.86-2.01]       | 0.9     | 0%   |                                                                       |
|                                   | Mixed/unreported          | 2 | 358  | 7.94 [-19.42-35.30]     | 0.6     | 99%  |                                                                       |
| Baseline iron status              | Iron Deficient            | 2 | 204  | 2.55 [-0.45-5.55]       | 0.1     | 0%   | Chi <sup>2</sup> =2.22; df=2,<br>P=0.3; I <sup>2</sup> =9.9%          |
|                                   | Iron Replete              | 2 | 1282 | 0.20 [-1.76-2.16]       | 0.8     | 0%   |                                                                       |
|                                   | Mixed/ unreported         | 3 | 386  | 8.92 [-11.79-29.62]     | 0.4     | 99%  |                                                                       |
| Baseline Iron Deficiency status   | Iron deficiency anemia    | 2 | 158  | 2.99 [-0.11-6.09]       | 0.06    | 0%   | Chi <sup>2</sup> =4.30; df=3,<br>P=0.2; I <sup>2</sup> =30.3%         |
|                                   | Iron deficient not anemic | 1 | 46   | -6.00 [-17.09-5.09]     | 0.3     | N/A  |                                                                       |
|                                   | Not replete non anemic    | 2 | 1282 | 0.20 [-1.76-2.16]       | 0.8     | 0%   |                                                                       |
|                                   | Mixed/Unreported          | 3 | 386  | 8.92 [-11.79-29.63]     | 0.4     | 99%  |                                                                       |
| Dose                              | 12.5mg or less            | 0 | N/A  |                         |         |      | Chi <sup>2</sup> =27.41; df=2,<br>P<0.00001;<br>I <sup>2</sup> =92.7% |
|                                   | 12.6-30mg                 | 2 | 125  | 17.26 [6.67-27.84]      | 0.001   | 80%  |                                                                       |
|                                   | 31-60mg                   | 1 | 261  | -6.00 [(-8.92)-(-3.08)] | <0.0001 | N/A  |                                                                       |
|                                   | >61mg                     | 0 | N/A  |                         |         |      |                                                                       |
|                                   | Dose mixed/ unspecified   | 2 | 1488 | 0.95 [-0.70-2.59]       | 0.3     | 0%   |                                                                       |
| Duration                          | 1 month or less           | 0 | N/A  |                         |         |      | Chi <sup>2</sup> =2.96; df=1,<br>P=0.09; I <sup>2</sup> =66.3%        |
|                                   | >1 month to 3 months      | 3 | 255  | 11.47 [-3.85-26.79]     | 0.1     | 98%  |                                                                       |
|                                   | > 3 months                | 2 | 1619 | -2.95 [-8.85-2.95]      | 0.3     | 89%  |                                                                       |
| Malaria endemicity                | Endemic                   | 0 | N/A  |                         |         |      | Chi <sup>2</sup> =2.96; df=1,<br>P=0.09; I <sup>2</sup> =66.3%        |
|                                   | Non-Endemic               | 2 | 1619 | -2.95 [-8.85-2.95]      | 0.3     | 89%  |                                                                       |
|                                   | Unstated                  | 3 | 255  | 11.47 [-3.85-26.79]     | 0.1     | 98%  |                                                                       |
| Iron Combination                  | Iron vs control           | 3 | 255  | 11.47 [-3.85-26.79]     | 0.1     | 98%  | Chi <sup>2</sup> =2.96; df=1,<br>P=0.09; I <sup>2</sup> =66.3%        |
|                                   | Iron + X vs X alone       | 2 | 1619 | -2.95 [-8.85-2.95]      | 0.3     | 89%  |                                                                       |

|                                        |                           |   |      |                         |         |     |                                                                     |
|----------------------------------------|---------------------------|---|------|-------------------------|---------|-----|---------------------------------------------------------------------|
| <b>Digit Span (MD)</b>                 | Overall                   | 5 | 836  | 0.14 [-0.55-0.84]       | 0.7     | 78% | N/A                                                                 |
| Baseline Hemoglobin                    | Anemic                    | 2 | 99   | 0.32 [-0.44-1.07]       | 0.4     | 0%  | Chi <sup>2</sup> =1.36 df=2,<br>P=0.5; I <sup>2</sup> =0%           |
|                                        | Non-anemic                | 2 | 33   | 0.34 [-0.72-1.40]       | 0.5     | 61% |                                                                     |
|                                        | Mixed/unreported          | 2 | 678  | -0.44 [-1.56-0.69]      | 0.5     | 68% |                                                                     |
| Baseline iron status                   | Iron Deficient            | 0 | N/A  |                         |         |     | N/A                                                                 |
|                                        | Iron Replete              | 0 | N/A  |                         |         |     |                                                                     |
|                                        | Mixed/ unreported         | 5 | 836  | 0.14 [-0.55-0.84]       | 0.7     | 78% |                                                                     |
| Baseline Iron Deficiency status        | Iron deficiency anemia    | 0 | N/A  |                         |         |     | N/A                                                                 |
|                                        | Iron deficient not anemic | 0 | N/A  |                         |         |     |                                                                     |
|                                        | Not replete non anemic    | 0 | N/A  |                         |         |     |                                                                     |
|                                        | Mixed/Unreported          | 5 | 836  | 0.14 [-0.55-0.84]       | 0.7     | 78% |                                                                     |
| Dose                                   | 12.5mg or less            | 1 | 548  | -0.98 [(-1.66)-(-0.29)] | 0.005   | N/A | Chi <sup>2</sup> =15.84 df=2,<br>P=0.0004;<br>I <sup>2</sup> =87.4% |
|                                        | 12.6-30mg                 | 0 | N/A  |                         |         |     |                                                                     |
|                                        | 31-60mg                   | 3 | 279  | 0.45 [-0.07-0.83]       | 0.02    | 22% |                                                                     |
|                                        | >61 mg                    | 1 | 9    | 2.06 [-0.10-4.22]       | 0.06    | N/A |                                                                     |
|                                        | Dose mixed/ unspecified   | 0 | 0    |                         |         |     |                                                                     |
| Duration                               | 1 month or less           | 0 | N/A  |                         |         |     | Chi <sup>2</sup> =3.66 df=1,<br>P=0.06; I <sup>2</sup> =72.7%       |
|                                        | >1 month to 3 months      | 1 | 48   | 1.25 [0.14-2.36]        | 0.03    | N/A |                                                                     |
|                                        | > 3 months                | 4 | 788  | -0.05 [-0.80-0.69]      | 0.09    | 79% |                                                                     |
| Malaria endemicity                     | Endemic                   | 0 | N/A  |                         |         |     | N/A                                                                 |
|                                        | Non-Endemic               | 0 | N/A  |                         |         |     |                                                                     |
|                                        | Unstated                  | 5 | 836  | 0.14 [-0.55-0.84]       | 0.7     | 78% |                                                                     |
| Iron Combination                       | Iron vs control           |   |      |                         |         |     |                                                                     |
|                                        | Iron + X vs X alone       |   |      |                         |         |     |                                                                     |
| <b>Mazes Test (MD)</b>                 | Overall                   | 4 | 288  | 1.30 [0.90-1.71]        | <0.0001 | 0%  | N/A                                                                 |
| <b>Clerical Task (SMD)</b>             | Overall                   | 4 | 290  | 0.44 [0.14-0.75]        | 0.005   | 30% | N/A                                                                 |
| <b>Visual Memory score (MD)</b>        | Overall                   | 3 | 279  | 0.53 [-0.32-1.37]       | 0.2     | 78% | N/A                                                                 |
| <b>Maths Score (SMD)</b>               | Overall                   | 3 | 2078 | -0.05 [-0.17-0.07]      | 0.4     | 32% | N/A                                                                 |
| <b>Language Score (SMD)</b>            | Overall                   | 2 | 1488 | 0.32 [-0.30-0.94]       | 0.3     | 91% | N/A                                                                 |
| <b>Other micronutrients and metals</b> |                           |   |      |                         |         |     |                                                                     |
| <b>Serum Zinc (MD)</b>                 | Overall                   | 5 | 1553 | 0.16 [-0.46-0.79]       | 0.6     | 76% | N/A                                                                 |
| Baseline Hemoglobin                    | Anemic                    | 0 | N/A  |                         |         |     | Chi <sup>2</sup> =0.23; df=1,<br>P=0.6; I <sup>2</sup> =0%          |
|                                        | Non-anemic                | 1 | 16   | -0.50 [3.24-2.24]       | 0.7     | N/A |                                                                     |
|                                        | Mixed/unreported          | 4 | 1537 | 0.19 [-0.46-0.84]       | 0.6     | 76% |                                                                     |
| Baseline iron status                   | Iron Deficient            | 0 | N/A  |                         |         |     | N/A                                                                 |
|                                        | Iron Replete              | 0 | N/A  |                         |         |     |                                                                     |
|                                        | Mixed/ unreported         | 5 | 1553 | 0.16 [-0.46-0.79]       | 0.6     | 76% |                                                                     |

|                                 |                           |   |      |                    |      |     |                                                              |
|---------------------------------|---------------------------|---|------|--------------------|------|-----|--------------------------------------------------------------|
| Baseline Iron Deficiency status | Iron deficiency anemia    | 0 | N/A  |                    |      |     | N/A                                                          |
|                                 | Iron deficient not anemic | 0 | N/A  |                    |      |     |                                                              |
|                                 | Not replete non anemic    | 0 | N/A  |                    |      |     |                                                              |
|                                 | Mixed/Unreported          | 5 | 1553 | 0.16 [-0.46-0.79]  | 0.6  | 76% |                                                              |
| Dose                            | 12.5mg or less            | 3 | 654  | 0.02 [-0.85-0.89]  | 1.0  | 77% | Chi <sup>2</sup> =0.15; df=1, P=0.7; I <sup>2</sup> =0%      |
|                                 | 12.6-30mg                 | 2 | 899  | 0.30 [-0.80-1.39]  | 0.6  | 75% |                                                              |
|                                 | 31-60mg                   | 0 | N/A  |                    |      |     |                                                              |
|                                 | >61mg                     | 0 | N/A  |                    |      |     |                                                              |
|                                 | Dose mixed/ unspecified   | 0 | N/A  |                    |      |     |                                                              |
| Duration                        | 1 month or less           | 0 | N/A  |                    |      |     | Chi <sup>2</sup> =0.31; df=2, P=0.9; I <sup>2</sup> =0%      |
|                                 | >1 month to 3 months      | 1 | 63   | 0.06 [-0.86-0.97]  | 0.9  | N/A |                                                              |
|                                 | > 3 months                | 4 | 1490 | 0.18 [-0.59-0.95]  | 0.7  | 80% |                                                              |
| Malaria endemicity              | Endemic                   | 1 | 836  | 0.48 [-1.67-2.64]  | 0.7  | N/A | Chi <sup>2</sup> =0.13; df=1, P=0.7; I <sup>2</sup> =0%      |
|                                 | Non-Endemic               | 1 | 16   | -0.50 [-3.24-2.24] | 0.7  | N/A |                                                              |
|                                 | Unstated                  | 3 | 701  | 0.07 [-0.60-0.74]  | 0.8  | 70% |                                                              |
| Iron Combination                | Iron vs control           | 4 | 754  | 0.80 [0.06-1.54]   | 0.03 | 50% | Chi <sup>2</sup> =7.07; df=1, P=0.008; I <sup>2</sup> =85.9% |
|                                 | Iron + zinc vs zinc       | 4 | 799  | -0.34 [0.74-0.06]  | 0.1  | 76% |                                                              |
| <b>Zinc protorphyrin (SMD)</b>  | Overall                   | 2 | 705  | -0.16 [-0.40-0.08] | 0.2  | 59% | N/A                                                          |
| <b>Growth</b>                   |                           |   |      |                    |      |     |                                                              |
| <b>Height (MD)</b>              | Overall                   | 5 | 1111 | -0.37 [-1.14-0.40] | 0.3  | 0%  | N/A                                                          |
| Baseline Hemoglobin             | Anemic                    | 1 | 78   | 2.25 [-0.88-5.38]  | 0.2  | N/A | Chi <sup>2</sup> =4.84; df=2, P=0.09; I <sup>2</sup> =58.6%  |
|                                 | Non-anemic                | 1 | 41   | 2.31 [-1.59-6.21]  | 0.3  | N/A |                                                              |
|                                 | Mixed/unreported          | 4 | 992  | -0.61 [-1.42-0.20] | 0.1  | 0%  |                                                              |
| Baseline iron status            | Iron Deficient            | 1 | 78   | 2.25 [-0.88-5.38]  | 0.2  | N/A | Chi <sup>2</sup> =4.84; df=2, P=0.09; I <sup>2</sup> =58.6%  |
|                                 | Iron Replete              | 1 | 41   | 2.31 [-1.59-6.21]  | 0.23 | N/A |                                                              |
|                                 | Mixed/ unreported         | 4 | 992  | -0.61 [-1.42-0.20] | 0.1  | 0%  |                                                              |
| Baseline Iron Deficiency status | Iron deficiency anemia    | 1 | 78   | 2.25 [-0.88-5.38]  | 0.12 | N/A | Chi <sup>2</sup> =4.84; df=2, P=0.09; I <sup>2</sup> =58.6%  |
|                                 | Iron deficient not anemic | 1 | 41   | 2.31 [-1.59-6.21]  | 0.3  | N/A |                                                              |
|                                 | Not replete non anemic    | 0 | N/A  |                    |      |     |                                                              |
|                                 | Mixed/Unreported          | 4 | 992  | -0.61 [-1.42-0.20] | 0.1  | 0%  |                                                              |
| Dose                            | 12.5mg or less            | 2 | 709  | -0.06 [-1.26-1.13] | 0.9  | 42% | Chi <sup>2</sup> =0.94; df=2, P=0.6; I <sup>2</sup> =0%      |
|                                 | 12.6-30mg                 | 0 | N/A  |                    |      |     |                                                              |
|                                 | 31-60mg                   | 2 | 347  | -0.99 [-2.92-0.95] | 0.3  | 0%  |                                                              |
|                                 | >61mg                     | 1 | 55   | -1.40 [-5.11-2.31] | 0.5  | N/A |                                                              |
|                                 | Dose mixed/ unspecified   | 0 | N/A  |                    |      |     |                                                              |
| Duration                        | 1 month or less           | 0 | N/A  |                    |      |     | Chi <sup>2</sup> =3.50; df=1, P=0.06; I <sup>2</sup> =71.4%  |
|                                 | >1 month to 3 months      | 1 | 119  | 1.86 [-0.60-4.32]  | 0.1  | N/A |                                                              |

|                                 |                           |   |      |                    |       |     |                                                                |
|---------------------------------|---------------------------|---|------|--------------------|-------|-----|----------------------------------------------------------------|
|                                 | > 3 months                | 4 | 992  | -0.61 [-1.42-0.20] | 0.1   | 0%  |                                                                |
| Malaria endemicity              | Endemic                   | 3 | 260  | 0.06 [-2.13-2.24]  | 1.0   | 38% | Chi <sup>2</sup> =0.33; df=2,<br>P=0.9; I <sup>2</sup> =0%     |
|                                 | Non-Endemic               | 1 | 261  | -0.90 [-3.45-1.65] | 0.5   | N/A |                                                                |
|                                 | Unstated                  | 1 | 590  | -0.48 [-1.39-0.44] | 0.31  | N/A |                                                                |
| Iron Combination                | Iron vs control           | 3 | 497  | -0.11 [-1.82-1.61] | 0.9   | 47% | Chi <sup>2</sup> =0.10; df=1,<br>P=0.8; I <sup>2</sup> =0%     |
|                                 | Iron + X vs X alone       | 3 | 614  | -0.42 [-1.50-0.65] | 0.4   | 0%  |                                                                |
| <b>Z score for height (MD)</b>  | Overall                   | 5 | 1318 | 0.09 [0.01-0.17]   | 0.03  | 10% |                                                                |
| Baseline Hemoglobin             | Anemic                    | 1 | 78   | 0.10 [-0.05-0.25]  | 0.2   | N/A | Chi <sup>2</sup> =0.03; df=2,<br>P=1.0; I <sup>2</sup> =0%     |
|                                 | Non-anemic                | 2 | 57   | 0.08 [-0.21-0.38]  | 0.6   | 79% |                                                                |
|                                 | Mixed/unreported          | 3 | 1183 | 0.09 [-0.02-0.19]  | 0.1   | 0%  |                                                                |
| Baseline iron status            | Iron Deficient            | 1 | 78   | 0.10 [-0.05-0.25]  | 0.2   | N/A | Chi <sup>2</sup> =2.92; df=2,<br>P=0.23; I <sup>2</sup> =31.6% |
|                                 | Iron Replete              | 1 | 41   | -0.07 [-0.27-0.13] | 0.7   | N/A |                                                                |
|                                 | Mixed/ unreported         | 4 | 1199 | 0.12 [0.03-0.21]   | 0.008 | 0%  |                                                                |
| Baseline Iron Deficiency status | Iron deficiency anemia    | 1 | 78   | 0.10 [-0.05-0.25]  | 0.2   | N/A | Chi <sup>2</sup> =2.92; df=2,<br>P=0.2; I <sup>2</sup> =31.6%  |
|                                 | Iron deficient not anemic | 0 | N/A  |                    |       |     |                                                                |
|                                 | Not replete non anemic    | 1 | 41   | -0.07 [-0.27-0.13] | 0.7   | N/A |                                                                |
|                                 | Mixed/Unreported          | 4 | 1199 | 0.12 [0.03-0.21]   | 0.008 | 0%  |                                                                |
| Dose                            | 12.5mg or less            | 2 | 135  | 0.11 [-0.09-0.32]  | 0.3   | 72% | Chi <sup>2</sup> =1.17; df=2,<br>P=0.6; I <sup>2</sup> =0%     |
|                                 | 12.6-30mg                 | 1 | 836  | 0.12 [0.00-0.23]   | 0.05  | N/A |                                                                |
|                                 | 31-60mg                   | 2 | 347  | 0.00 [-0.20-0.29]  | 1.0   | 0%  |                                                                |
|                                 | >61mg                     | 0 | N/A  |                    |       |     |                                                                |
|                                 | Dose mixed/ unspecified   | 0 | N/A  |                    |       |     |                                                                |
| Duration                        | 1 month or less           | 0 | N/A  |                    |       |     | Chi <sup>2</sup> =1.64; df=1,<br>P=0.2; I <sup>2</sup> =38.8%  |
|                                 | >1 month to 3 months      | 1 | 119  | 0.02 [-0.11-0.15]  | 0.8   | N/A |                                                                |
|                                 | > 3 months                | 4 | 1199 | 0.12 [0.03-0.21]   | 0.008 | 0%  |                                                                |
| Malaria endemicity              | Endemic                   | 3 | 1041 | 0.07 [-0.01-0.16]  | 0.09  | 0%  | Chi <sup>2</sup> =0.06; df=1,<br>P=0.8; I <sup>2</sup> =0%     |
|                                 | Non-Endemic               | 2 | 277  | 0.11 [-0.15-0.36]  | 0.1   | 69% |                                                                |
|                                 | Unstated                  | 0 | N/A  |                    |       |     |                                                                |
| Iron Combination                | Iron vs control           | 4 | 638  | 0.12 [0.01-0.23]   | 0.03  | 28% | Chi <sup>2</sup> =1.00; df=1,<br>P=0.3; I <sup>2</sup> =0%     |
|                                 | Iron + X vs X alone       | 2 | 680  | 0.03 [-0.10-0.17]  | 0.6   | 0%  |                                                                |
| <b>Weight (MD)</b>              | Overall                   | 5 | 1111 | 0.12 [-0.50-0.75]  | 0.7   | 0%  |                                                                |
| Baseline Hemoglobin             | Anemic                    | 1 | 78   | 1.62 [-0.24-3.48]  | 0.09  | N/A | Chi <sup>2</sup> =2.55; df=2,<br>P=0.3; I <sup>2</sup> =21.6%  |
|                                 | Non-anemic                | 1 | 41   | 0.92 [-1.19-3.03]  | 0.4   | N/A |                                                                |
|                                 | Mixed/unreported          | 4 | 992  | 0.12 [-0.50-0.75]  | 0.7   | 0%  |                                                                |
| Baseline iron status            | Iron Deficient            | 1 | 78   | 1.62 [-0.24-3.48]  | 0.09  | N/A | Chi <sup>2</sup> =2.55; df=2,<br>P=0.3; I <sup>2</sup> =21.6%  |
|                                 | Iron Replete              | 1 | 41   | 0.92 [-1.19-3.03]  | 0.4   | N/A |                                                                |

|                                 |                           |   |      |                    |       |     |                                                            |
|---------------------------------|---------------------------|---|------|--------------------|-------|-----|------------------------------------------------------------|
|                                 | Mixed/ unreported         | 4 | 992  | 0.12 [-0.50-0.75]  | 0.7   | 0%  |                                                            |
| Baseline Iron Deficiency status | Iron deficiency anemia    | 1 | 78   | 1.62 [-0.24-3.48]  | 0.09  | N/A | Chi <sup>2</sup> =2.55; df=2, P=0.3; I <sup>2</sup> =21.6% |
|                                 | Iron deficient not anemic | 1 | 41   | 0.92 [-1.19-3.03]  | 0.4   | N/A |                                                            |
|                                 | Not replete non anemic    | 0 | N/A  |                    |       |     |                                                            |
|                                 | Mixed/Unreported          | 4 | 992  | 0.12 [-0.50-0.75]  | 0.7   | 0%  |                                                            |
| Dose                            | 12.5mg or less            | 2 | 709  | 0.13 [-0.98-1.23]  | 0.8   | 44% | Chi <sup>2</sup> =0.26; df=2, P=0.9; I <sup>2</sup> =0%    |
|                                 | 12.6-30mg                 | 0 | N/A  |                    |       |     |                                                            |
|                                 | 31-60mg                   | 2 | 347  | -0.04 [-1.20-1.12] | 1.0   | 0%  |                                                            |
|                                 | >61mg                     | 1 | 55   | 0.50 [-1.24-2.24]  | 0.6   | N/A |                                                            |
|                                 | Dose mixed/ unspecified   | 0 | N/A  |                    |       |     |                                                            |
| Duration                        | 1 month or less           | 0 | N/A  |                    |       |     | Chi <sup>2</sup> =2.66; df=1, P=0.1; I <sup>2</sup> =62.4% |
|                                 | >1 month to 3 months      | 1 | 119  | 1.18 [-0.24-2.60]  | 0.1   | N/A |                                                            |
|                                 | > 3 months                | 4 | 992  | -0.13 [-0.83-0.57] | 0.7   | 0%  |                                                            |
| Malaria endemicity              | Endemic                   | 3 | 260  | 0.59 [-0.29-1.48]  | 0.2   | 0%  | Chi <sup>2</sup> =2.24; df=2, P=0.3; I <sup>2</sup> =10.7% |
|                                 | Non-Endemic               | 1 | 261  | -0.10 [-1.92-1.72] | 0.9   | N/A |                                                            |
|                                 | Unstated                  | 1 | 590  | -0.42 [-1.44-0.59] | 0.4   | N/A |                                                            |
| Iron Combination                | Iron vs control           | 3 | 497  | 0.39 [-0.46-1.24]  | 0.4   | 0%  | Chi <sup>2</sup> =0.84; df=1, P=0.4; I <sup>2</sup> =0%    |
|                                 | Iron + X vs X alone       | 3 | 614  | -0.20 [-1.13-0.73] | 0.7   | 0%  |                                                            |
| <b>Z score for weight (MD)</b>  | Overall                   | 5 | 1318 | 0.10 [-0.03-0.23]  | 0.    | 70% |                                                            |
| Baseline Hemoglobin             | Anemic                    | 1 | 78   | 0.13 [0.04-0.22]   | 0.005 | N/A | Chi <sup>2</sup> =3.29; df=2, P=0.2; I <sup>2</sup> =39.2% |
|                                 | Non-anemic                | 2 | 57   | 0.18 [-0.24-0.60]  | 0.4   | 93% |                                                            |
|                                 | Mixed/unreported          | 3 | 1183 | 0.01 [-0.10-0.21]  | 0.9   | 0%  |                                                            |
| Baseline iron status            | Iron Deficient            | 1 | 78   | 0.13 [0.04-0.22]   | 0.005 | N/A | Chi <sup>2</sup> =3.66; df=2, P=0.2; I <sup>2</sup> =45.4% |
|                                 | Iron Replete              | 1 | 41   | -0.03 [-0.17-0.11] | 0.7   | N/A |                                                            |
|                                 | Mixed/ unreported         | 4 | 1199 | 0.10 [-0.03-0.23]  | 0.1   | 70% |                                                            |
| Baseline Iron Deficiency status | Iron deficiency anemia    | 1 | 78   | 0.13 [0.04-0.22]   | 0.005 | N/A | Chi <sup>2</sup> =3.66; df=2, P=0.2; I <sup>2</sup> =45.4% |
|                                 | Iron deficient not anemic | 0 | N/A  |                    |       |     |                                                            |
|                                 | Not replete non anemic    | 1 | 41   | -0.03 [-0.17-0.11] | 0.7   | N/A |                                                            |
|                                 | Mixed/Unreported          | 4 | 1199 | 0.10 [-0.03-0.23]  | 0.1   | 70% |                                                            |
| Dose                            | 12.5mg or less            | 2 | 135  | 0.23 [-0.10-0.55]  | 0.1   | 91% | Chi <sup>2</sup> =2.40; df=2, P=0.3; I <sup>2</sup> =16.8% |
|                                 | 12.6-30mg                 | 1 | 836  | -0.02 [-0.15-0.10] | 0.7   | 0%  |                                                            |
|                                 | 31-60mg                   | 2 | 347  | 0.08 [-0.11-0.27]  | 0.4   | 4%  |                                                            |
|                                 | >61mg                     | 0 | N/A  |                    |       |     |                                                            |
|                                 | Dose mixed/ unspecified   | 0 | N/A  |                    |       |     |                                                            |
| Duration                        | 1 month or less           | 0 | N/A  |                    |       |     | Chi <sup>2</sup> =0.19; df=1, P=0.7; I <sup>2</sup> =0%    |
|                                 | >1 month to 3 months      | 1 | 119  | 0.07 [-0.01-0.15]  | 0.08  | N/A |                                                            |
|                                 | > 3 months                | 4 | 1199 | 0.11 [-0.07-0.30]  | 0.2   | 75% |                                                            |
| Malaria endemicity              | Endemic                   | 3 | 1041 | 0.05 [-0.01-0.11]  | 0.1   | 0%  | Chi <sup>2</sup> =0.74; df=1,                              |

|                                                                       |                         |        |            |                   |      |     |                                                               |
|-----------------------------------------------------------------------|-------------------------|--------|------------|-------------------|------|-----|---------------------------------------------------------------|
|                                                                       | Non-Endemic<br>Unstated | 2<br>0 | 277<br>N/A | 0.22 [-0.16-0.59] | 0.3  | 86% | P=0.4; I <sup>2</sup> =0%                                     |
| Iron Combination                                                      | Iron vs control         | 4      | 638        | 0.15 [-0.04-0.34] | 0.1  | 81% | Chi <sup>2</sup> =1.27; df=1,<br>P=0.3; I <sup>2</sup> =21.3% |
|                                                                       | Iron + X vs X alone     | 2      | 680        | 0.01 [-0.12-0.15] | 0.8  | 0%  |                                                               |
| <b>Arm Circumference (MD)</b>                                         | Overall                 | 2      | 174        | 0.39 [0.02-0.76]  | 0.04 | 0%  | N/A                                                           |
| <b>Infection Risk</b>                                                 |                         |        |            |                   |      |     |                                                               |
| <b>Malaria (Risk Ratio)</b>                                           | Overall                 | 4      | 919        | 1.10 [0.94-1.29]  | 0.24 | 0%  | N/A                                                           |
| <b>Rates of Positive Malaria Test (Rate Ratio)</b>                    | Overall                 | 4      | 1818       | 1.05 [0.90-1.21]  | 0.6  | 0%  | N/A                                                           |
| <b>Rates of positive tests for Plasmodium falciparum (Rate Ratio)</b> | Overall                 | 2      | 1136       | 1.02 [0.81-1.29]  | 0.9  | 0%  | N/A                                                           |
| <b>Rates of positive tests for Plasmodium vivax (Rate Ratio)</b>      | Overall                 | 2      | 1136       | 1.07 [0.85-1.34]  | 0.6  | 0%  | N/A                                                           |
| <b>Ascaris infection (Risk Ratio)</b>                                 | Overall                 | 2      | 270        | 1.01 [0.78-1.31]  | 0.9  | 0%  | N/A                                                           |
| <b>Splenomegaly (Risk Ratio)</b>                                      | Overall                 | 2      | 566        | 0.90 [0.54-1.50]  | 0.7  | 81% | N/A                                                           |
| <b>Side effects</b>                                                   |                         |        |            |                   |      |     |                                                               |
| <b>Gastrointestinal upset (Risk Ratio)</b>                            | Overall                 | 4      | 576        | 1.30 [0.89-1.91]  | 0.2  | 0%  | N/A                                                           |
| <b>Constipation (Risk Ratio)</b>                                      | Overall                 | 2      | 202        | 3.44 [0.66-19.68] | 0.12 | 6%  | N/A                                                           |
| <b>Vomiting (Risk Ratio)</b>                                          | Overall                 | 2      | 202        | 0.86 [0.13-5.67]  | 0.9  | 0%  | N/A                                                           |

N/A = not applicable
