# Supplementary material
Source: PubMed Central journal article supplement (PMC3832580)

### Appendix 3: Cognitive performance

(A) Funnel plot for global cognitive performance revealing no asymmetry and no evidence of publication bias. (B) Forest plot for IQ subgroup analysis by baseline anemia status: iron supplementation improved IQ in anemic children (MD 4.55 [95% CI 0.16 - 8.94]) but not non-anemic children (MD 0.08 [95% CI -1.86 - 2.10]). IV: Inverse Variance. M-H: Mantel-Haenszel. Random: Random Effects. 95% CI: 95% Confidence Interval. Df: degrees of freedom.

A

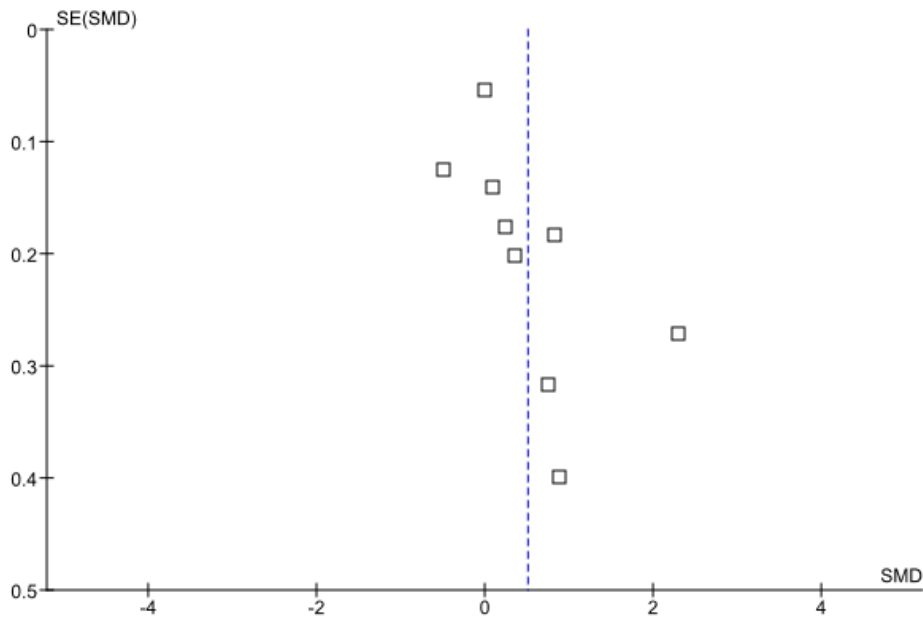

**B**

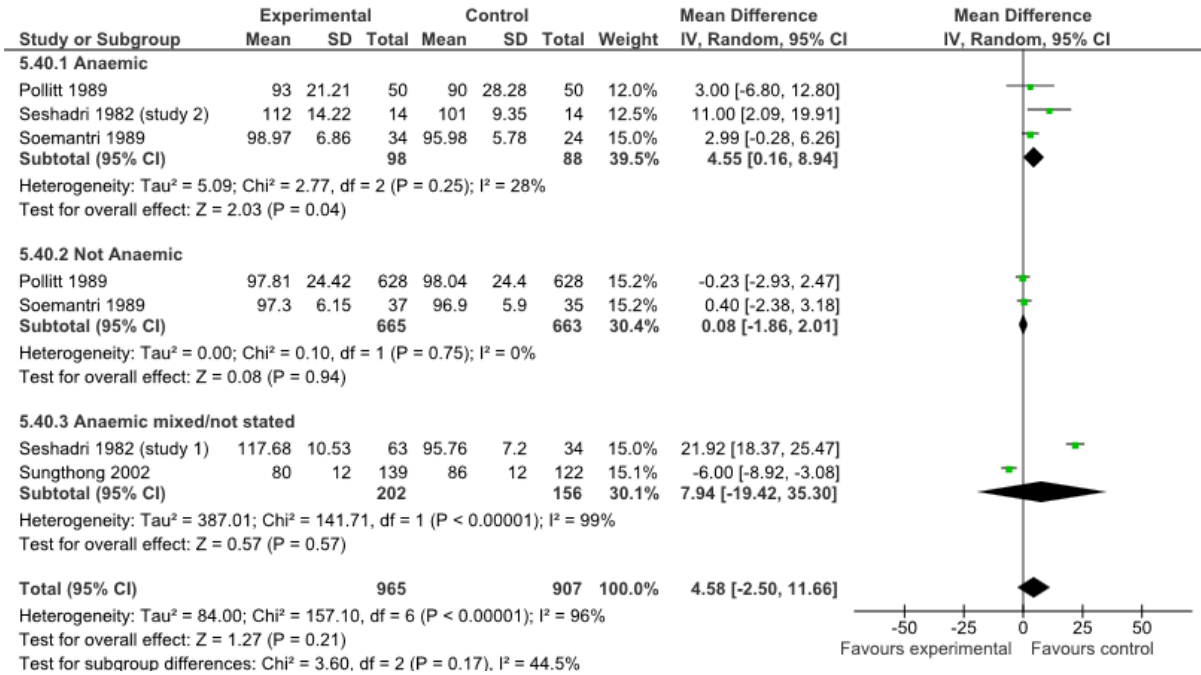

Supplement: supp_130628_iron-pasricha-3-at.pdf [file supp_130628_iron-pasricha-3-at.pdf]
