# Supplementary material
Source: PubMed Central journal article supplement (PMC3832580)

## Appendix 5: Hematologic and iron indices

Iron supplementation improved (A) hemoglobin (MD 8.38g/L [6.21 to 10.56g/L],  $p < 0.00001$ ,  $I^2 = 97\%$ ; 28 studies, 6545 children), (B) anemia (RR 0.50 [0.39 to 0.64],  $p < 0.00001$ ,  $I^2 = 85\%$ ; 7 studies, 1763 children), (C) ferritin (MD 28.45 $\mu$ g/L [18.03-38.86],  $p < 0.00001$ ,  $I^2 = 98\%$ , 12 studies, 3611 children) and (D) iron deficiency (RR 0.21 [0.07 to 0.63],  $p < 0.00001$ ,  $I^2 = 85\%$ , 4 studies, 1020 children). Forest plot for effect of iron on Funnel plots for effect of daily oral iron on (E) hemoglobin and (F) ferritin both showing no evidence of publication bias. Inverse Variance. M-H: Mantel-Haenszel. Random: Random Effects. 95% CI: 95% Confidence Interval. Df: degrees of freedom.

A

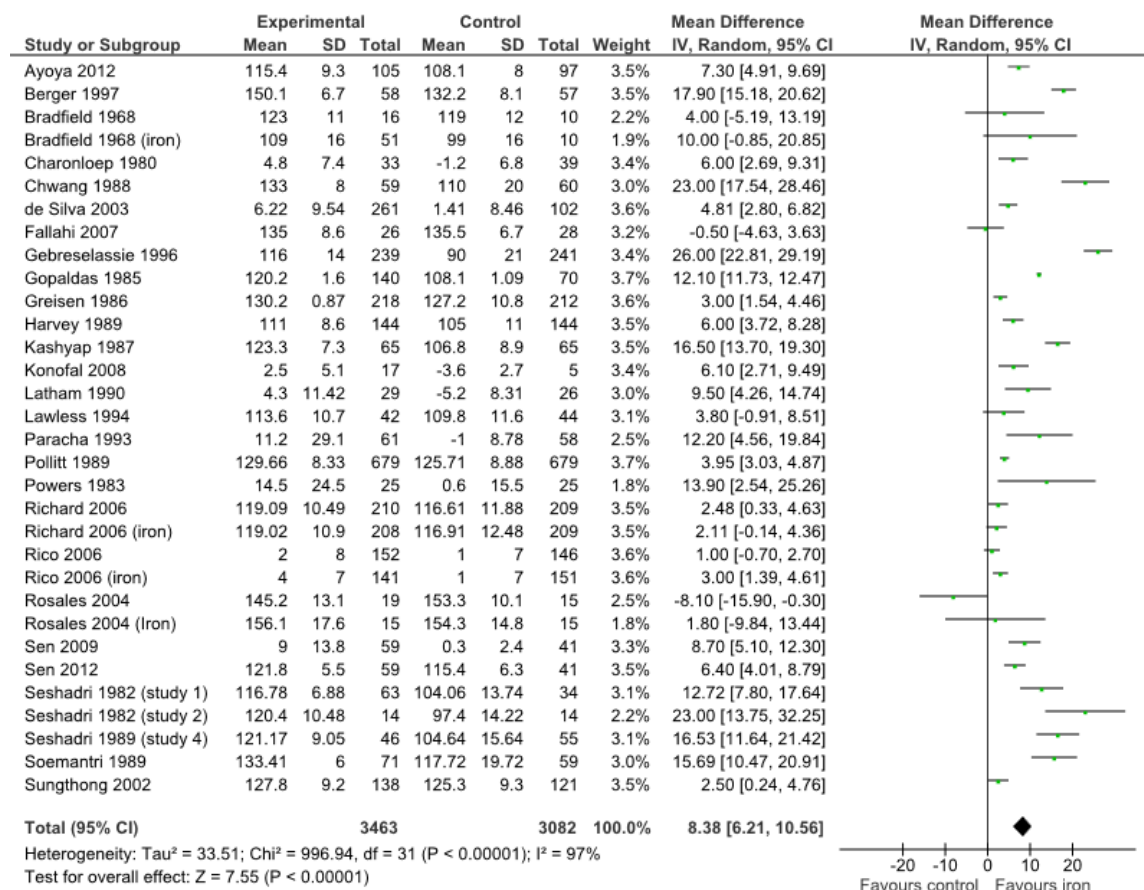

## B

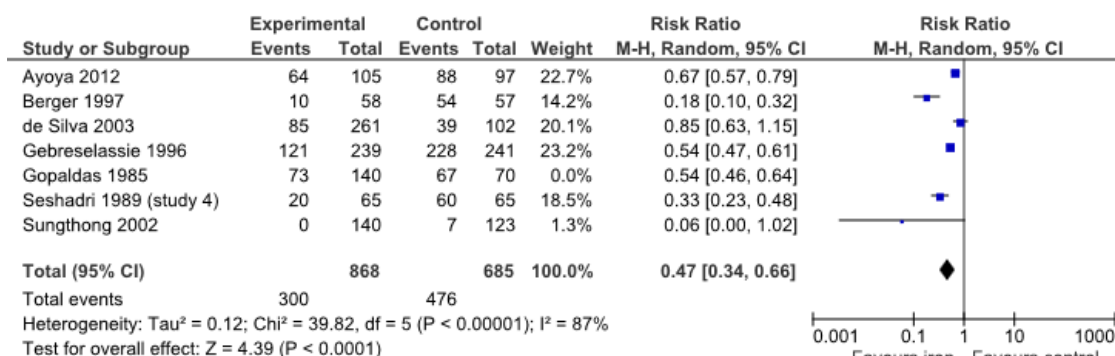

## C

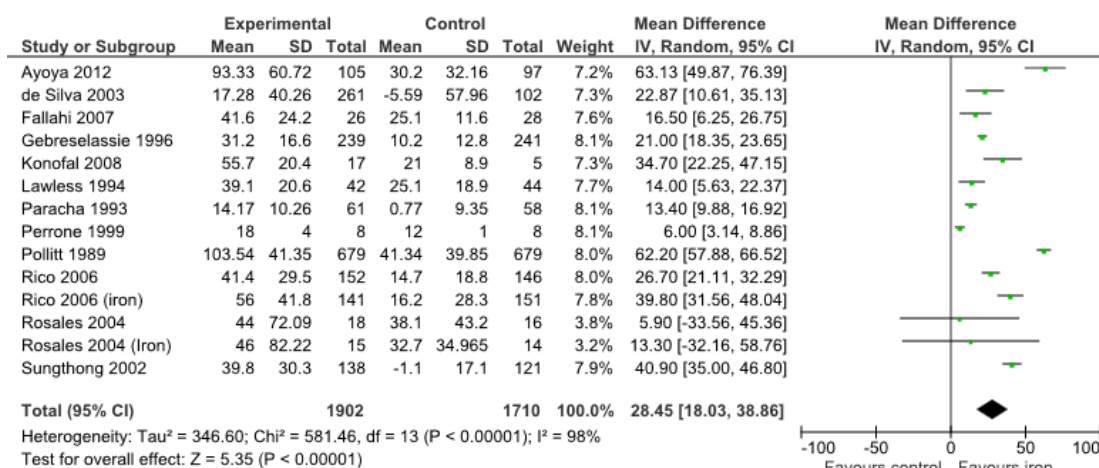

## D

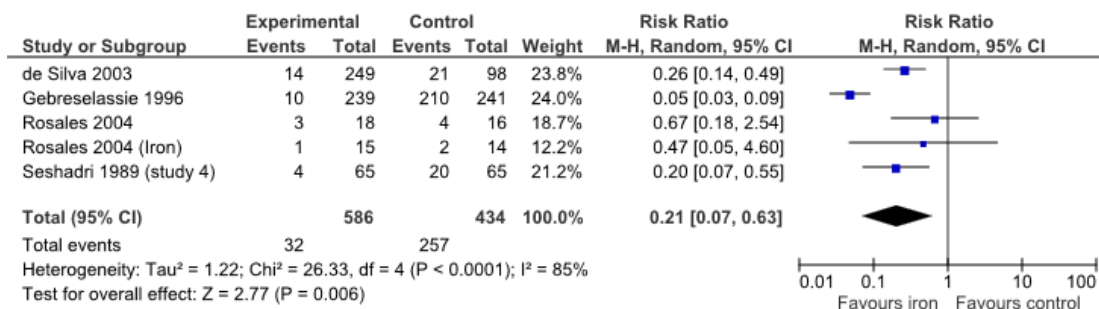

**E**

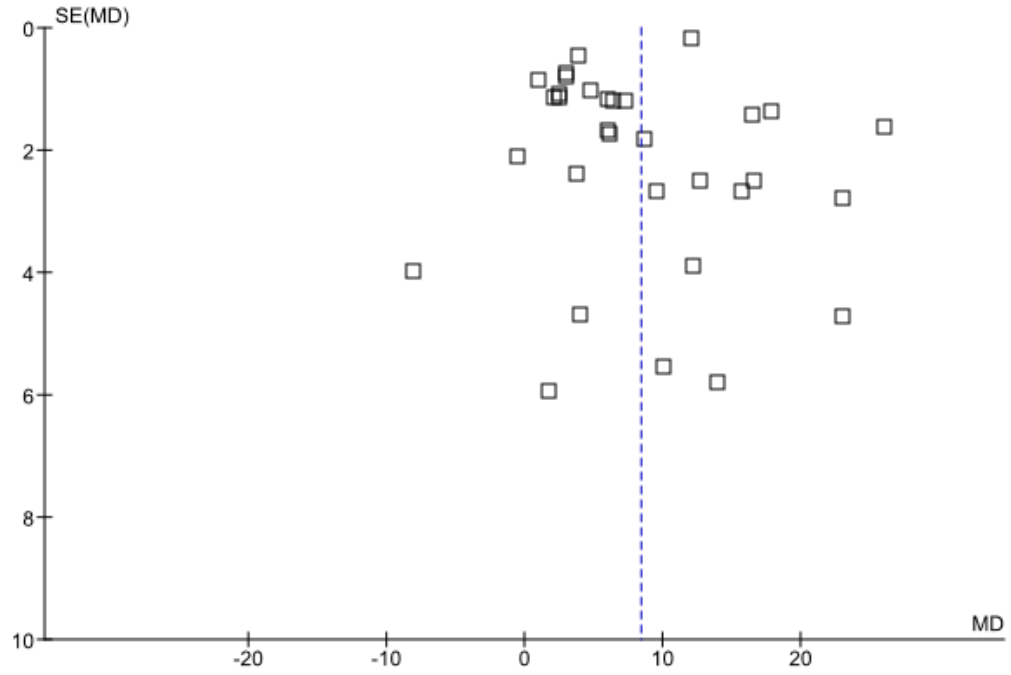

**F**

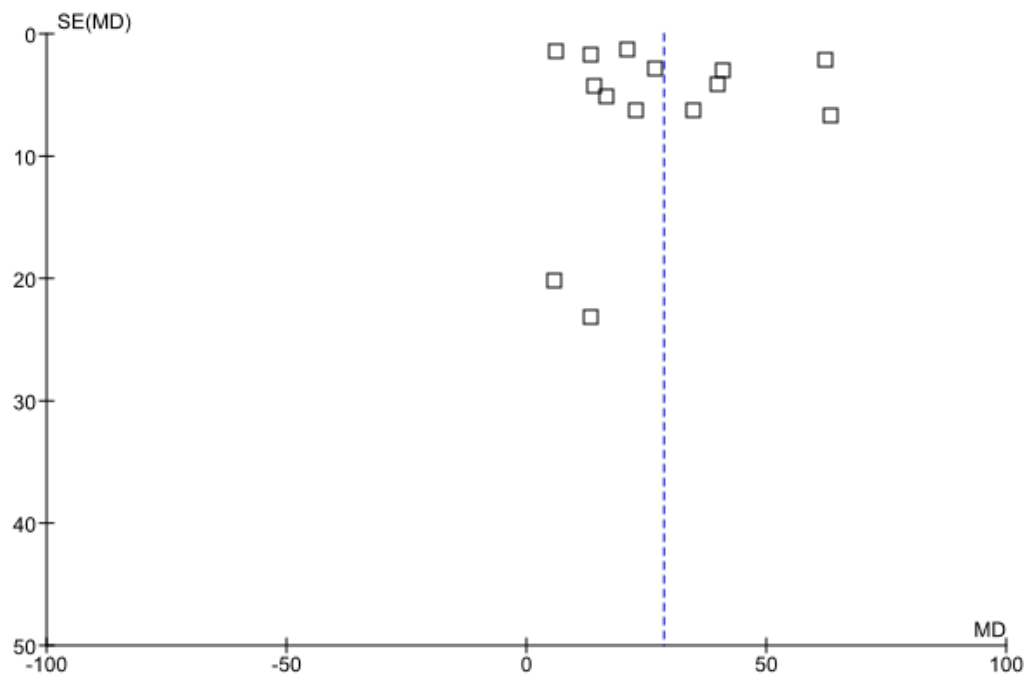

Supplement: supp_130628_iron-pasricha-5-at.pdf [file supp_130628_iron-pasricha-5-at.pdf]
